# Supplementary material
Source: PubMed Central journal article supplement (PMC2685165)
Supplement: NIHMS74249-supplement-Fig__S1.pdf [file NIHMS74249-supplement-Fig__S1.pdf]

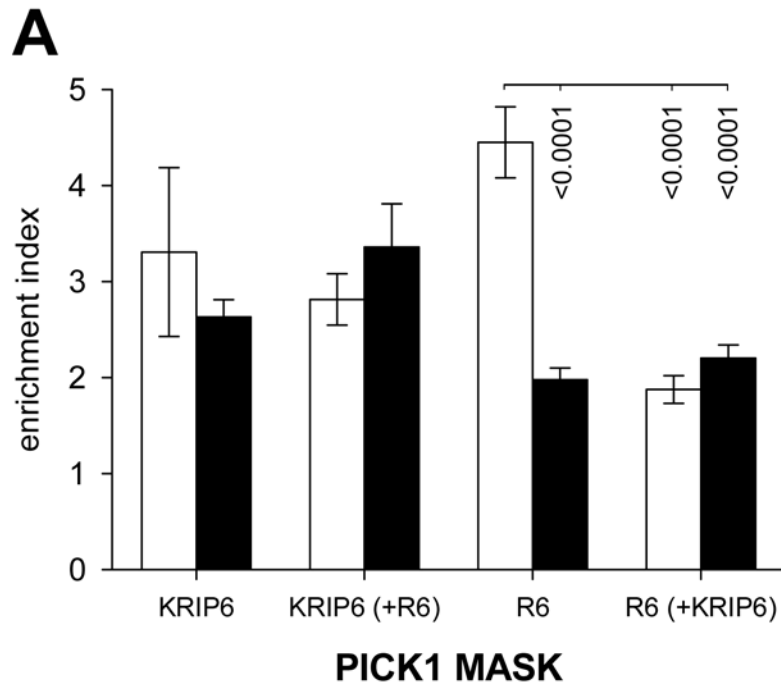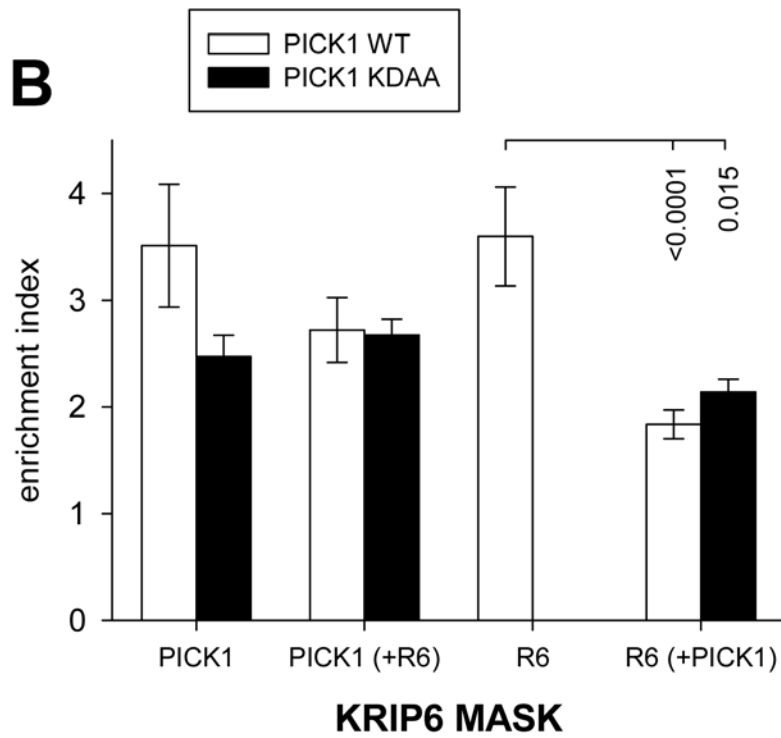

**Fig. S1. Mutation of the PICK1 PDZ domain reduces co-clustering with GluR6 but not with KRIP6.** (A, B) Bar graphs plot the enrichment index of KRIP6 and/or GluR6 co-expressed with wild type PICK1 (open bars, re-plotted from Fig. 3) or with the PICK1 KDAA double mutant (solid bars) calculated through a PICK1 MASK (A) or a KRIP6 mask (B). There was no significant difference between wild type PICK1 and PICK1 KDAA in the pair-wise enrichment index with KRIP6 (A), either alone ( $p = 0.49$ ;  $n = 9$  WT and 4 PICK1 KDAA, Mann–Whitney rank sum test) or together with GluR6 ( $p = 0.17$ ;  $n = 28$  WT and 12 PICK1 KDAA, Mann–Whitney rank sum test). Pair-wise enrichment of GluR6 with PICK1 KDAA was significantly lower than for wild type PICK1 ( $4.45 \pm 0.37$ ,  $n = 17$  versus  $1.98 \pm 0.12$ ,  $n = 9$ ;  $p < 0.0001$ , Mann–Whitney rank sum test), but was not further reduced by triple co-expression with KRIP6 ( $1.88 \pm 0.14$ ,  $n = 28$  versus  $2.20 \pm 0.14$ ,  $n = 12$ ;  $p = 0.20$ , Mann–Whitney rank sum test). Enrichment of GluR6 with KRIP6 was significantly lower with triple co-expression of either wild type ( $1.84 \pm 0.14$ ,  $n = 28$ ;  $p < 0.0001$ , Mann–Whitney rank sum test) or mutant ( $2.14 \pm 0.12$ ,  $n = 12$ ;  $p = 0.015$ , Mann–Whitney rank sum test) PICK1 as compared to pair-wise expression of KRIP6 and GluR6 alone ( $3.60 \pm 0.46$ ,  $n = 12$ , Mann–Whitney rank sum test).
